# Supplementary material for: Ionic liquid based dopant-free band edge shift in BiVO4 particles for photocatalysis under simulated sunlight irradiation
Source: Royal Society of Chemistry journal article supplement (doi:10.1039/d2ma00259k), 2022-01-01
Supplement: d2ma00259k1.pdf [file d2ma00259k1.pdf]

†Electronic supporting information

## Dopant-free band edge shift in BiVO<sub>4</sub> particles for enhanced oxygen evolution under simulated sunlight

Niqab Khan,<sup>\*a</sup> Rogério Nunes Wolff,<sup>a</sup> Hameed Ullah,<sup>a</sup> Gustavo J. Chacón,<sup>b</sup> Washington Santa Rosa,<sup>c</sup> Jairton Dupont,<sup>b</sup> Renato Vitalino Gonçalves,<sup>c</sup> Sherdil Khan,<sup>\*a</sup>

<sup>a</sup> Laboratory of Nanomaterials for Renewable Energy and Artificial Photosynthesis (NanoREAP), Programa de Pós-Graduação em Física (PPGFis), Federal University of Rio Grande do Sul (UFRGS), Campus do Vale, Agronomia, Porto Alegre-RS, Brazil.

<sup>b</sup> Laboratory of Molecular Catalysis (LAMOCA), Programa de Pós-Graduação em Química (PPQ), Federal University of Rio Grande do Sul (UFRGS), Campus do Vale, Agronomia, Porto Alegre-RS, Brazil.

<sup>c</sup> Laboratory of Artificial Photosynthesis (LAPA), Institute of Physics of São Carlos, University of São Paulo (USP), São Paulo, Brazil.

\* [sherdil.khan@ufrgs.br](mailto:sherdil.khan@ufrgs.br)

**Table S1.** Crystalline (based on XRD analyses) and morphological (based on SEM images) properties of synthesized BiVO<sub>4</sub> through [BMIm] and [M(MOE)Im] based ionic liquids.

| Sample                 | Crystallite size (nm) | Crystallinity (100%) | Particle size (nm) |
|------------------------|-----------------------|----------------------|--------------------|
| Pure BiVO <sub>4</sub> | 11                    | 54                   | 2725±86            |
| Bi:[V-Bm]              | 18                    | 86                   | 221±30             |
| Bi:[V-Me]              | 18                    | 76                   | 980±62             |
| [Bi-Bm]:[V-Bm]         | 19                    | *                    | 1733±72            |
| [Bi-Me]:[V-Me]         | 19                    | *                    | 3236±47            |

*\*Additional peaks of V<sub>2</sub>O<sub>5</sub> were observed which affect the crystallinity (%) calculations; therefore, their crystallinity was not calculated.*

**Table S2.** Raman shift and (V-O) bond length (Figure S4), surface area (Figure S4), bandgap (Figure 2c), V/B ratio (Figure 4) and oxygen evolution (Figure 5) of synthesized BiVO<sub>4</sub> with different ionic liquids

| Entry | Sample                 | Raman shift (cm <sup>-1</sup> ) | V-O length (Å) | S <sub>BET</sub> (m <sup>2</sup> /g) | Bandgap (eV) | V/B ratio | O <sub>2</sub> Evolution (μmol) |
|-------|------------------------|---------------------------------|----------------|--------------------------------------|--------------|-----------|---------------------------------|
| 1     | Bi:[V-Bm]              | 826.67                          | 1.6961         | 11.43                                | 2.41         | 0.51      | 28.6                            |
| 2     | [Bi-Bm]:[V-Bm]         | 828.24                          | 1.6950         | 11.66                                | 2.25         | 1.56      | 16.6                            |
| 3     | Bi:[V-Me]              | 824.90                          | 1.6971         | 11.79                                | 2.37         | 0.69      | 24.2                            |
| 4     | [Bi-Me]:[V-Me]         | 827.63                          | 1.6955         | 11.10                                | 2.29         | 1.72      | 3.2                             |
| 5     | Pure BiVO <sub>4</sub> | 828.91                          | 1.6947         | *                                    | 2.44         | 0.64      | 10.3                            |

\*Less than the instrument limit.

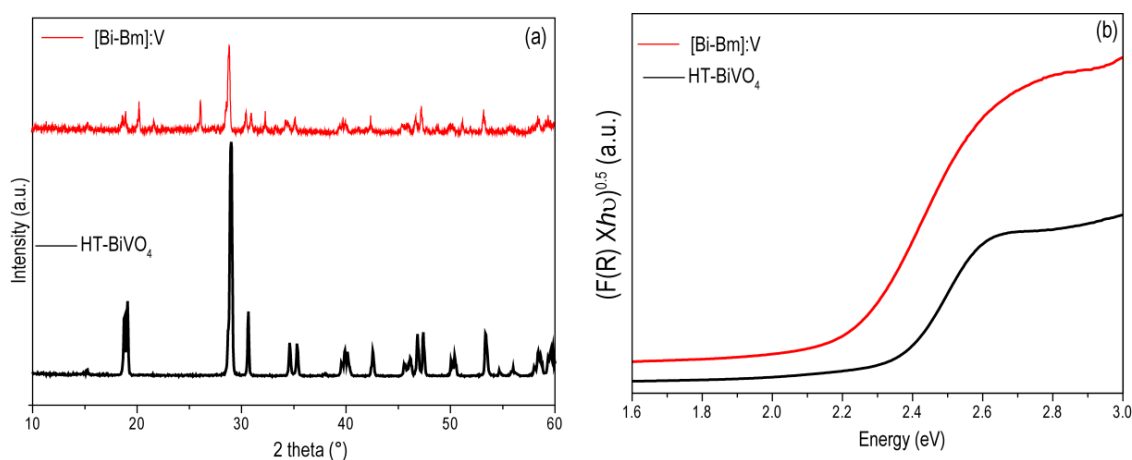

Figure S1. (a) XRD patterns and (b) UV –Vis diffused reflectance of [Bi-Bm]:V in which [BMIm] based IL anchored Bi was mixed with NH<sub>4</sub>VO<sub>3</sub> to form BiVO<sub>4</sub> and HT-BiVO<sub>4</sub> prepared by conventional hydrothermal process.

Figure S1 displays the XRD patterns of [Bi-Bm]:V and HT-BiVO<sub>4</sub>. For [Bi-Bm]:V in addition to BiVO<sub>4</sub> ((JCPDS) Card No. 14-0688), peaks at 2θ ~ 20°, 26° and 31° were also observed which correspond to V<sub>2</sub>O<sub>5</sub>. Furthermore, as compared to [Bi-Bm]:[V-Bm], and [Bi-Me]:[V-Me] (Figure 2), the relative peaks intensities of V<sub>2</sub>O<sub>5</sub> was higher for [Bi-Bm]:V, indicating the formation of larger content of V<sub>2</sub>O<sub>5</sub>. Thus, anchoring IL with Bi side for the formation of BiVO<sub>4</sub> strongly decreases the diffusibility of Bi with V for the complete formation of BiVO<sub>4</sub>. However, this synthesis results in large O defects,

thereby a notable red-shift in the bandgap was clearly observed as compared to HT-BiVO<sub>4</sub> (Figure S1b) and pure BiVO<sub>4</sub> (Figure 5).

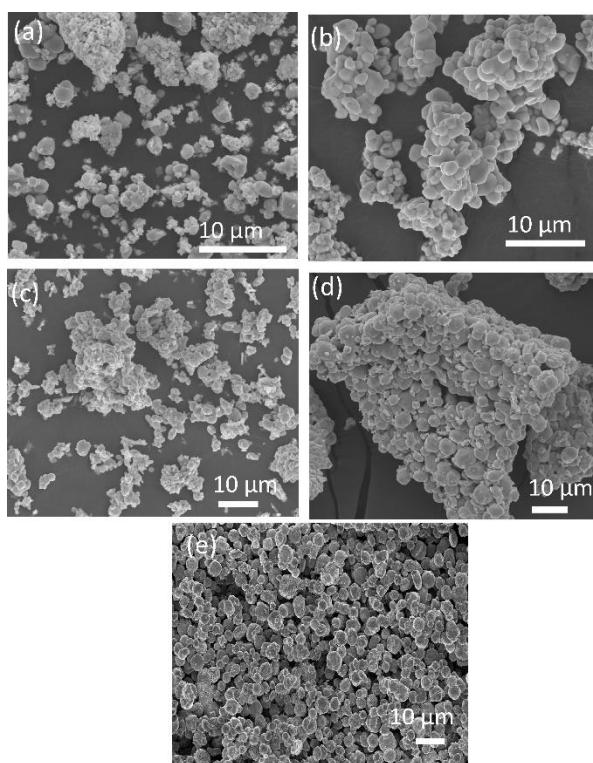

Figure S2. SEM images of the synthesized samples with and without ionic liquid. (a) Bi:[V-Bm], (b) Bi:[V-Me], (c) [Bi-Bm]:[V-Bm], (d) [Bi-Me]:[V-Me] and (e) Pure BiVO<sub>4</sub>.

Figure S2 compares the low magnification images of the prepared samples, the higher magnification SEM are presented in Figure 3. As compared to pure BiVO<sub>4</sub>, the samples prepared by IL presents smooth particles.

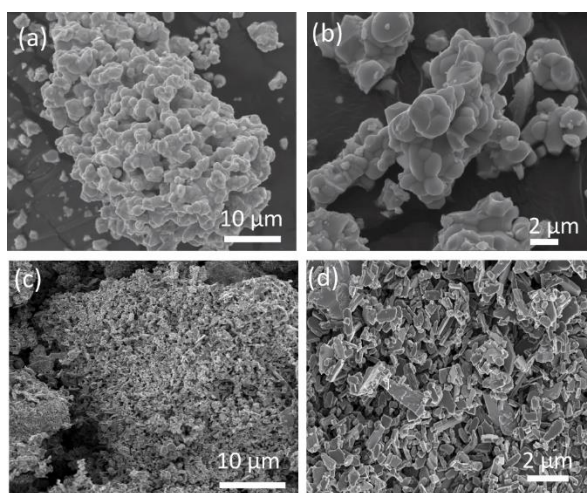

Figure S3, SEM images of (a-b) [Bi-Bm]:V in which [BMIm] based IL anchored Bi was mixed with NH<sub>4</sub>VO<sub>3</sub> to form BiVO<sub>4</sub> and (c-d) HT-BiVO<sub>4</sub> prepared by conventional hydrothermal process.

Figure S3 (a-b) displays the SEM images of HT-BiVO<sub>4</sub>; showing the obtained morphology is agglomerated microparticles. IL based synthesized [Bi-Bm]:V resulted into a totally different morphology (Figure S2 (c,d)) than HT-BiVO<sub>4</sub> and also as compared to all other samples (Figure 3).

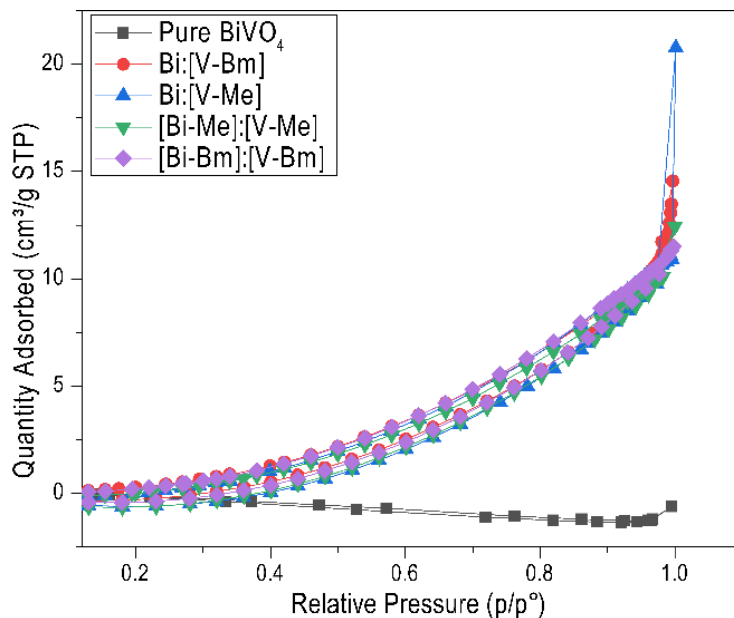

Figure S4. BET adsorption-desorption isotherms of the samples prepared with and without IL.

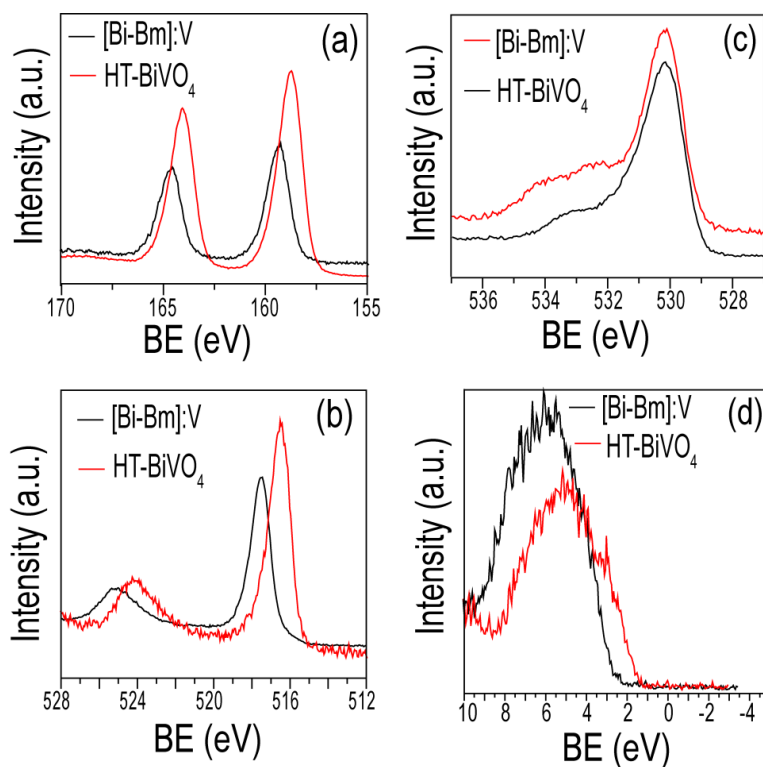

Figure S5. XPS spectra of the (a) Bi 4f, (b) V 2p and (c) O 1s core levels of [Bi-Bm]:V and HT-BiVO<sub>4</sub> and (d) their respective VB spectra. A clear peak shift in Bi df, V2p and VB can be observed for [Bi-Bm]:V as compared to HT-BiVO<sub>4</sub>.

Figure S5 displays XPS spectra of [Bi-Bm]:V and HT-BiVO<sub>4</sub>. The peaks positions of HT-BiVO<sub>4</sub> does not differ from pure BiVO<sub>4</sub> (Figure 4). A clear blue-shift is observed for [Bi-Bm]:V as compared to HT-BiVO<sub>4</sub> for Bi 4f, V2p and VB spectra. These results also agree with Figure 5 where blue-shift was clearly observed for IL based syntheses as compared to pure BiVO<sub>4</sub>. In addition, the O1s spectra of [Bi-Bm]:V (Figure S1c) is also similar to [Bi-Bm]:[V-Bm] and [Bi-Me]:[V-Me] which present an additional peak at BE~533.2 eV corresponding to chemisorbed oxygen species. Hence anchoring IL to Bi side improves the light absorption by upshifting the VB but with a drawback of low reactivity of Bi with V and accumulation of O species on BiVO<sub>4</sub> surface.

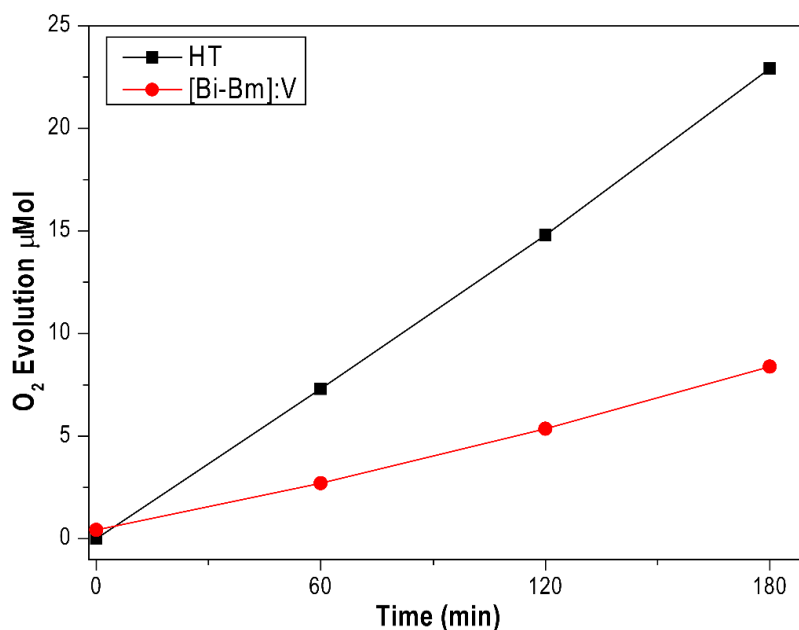

Figure S6. Oxygen evolution of [Bi-Bm]:V and HT-BiVO<sub>4</sub> for 3h exposure to 300 W Xe radiations filtered with AM 1.5G.

Figure S4 displays oxygen evolution of [Bi-Bm]:V and HT-BiVO<sub>4</sub> under simulated sunlight. Though [Bi-Bm]:V presented large absorption in the visible light, however due to accumulation of O species and presence of V<sub>2</sub>O<sub>5</sub> could not perform better as compared to HT-BiVO<sub>4</sub> and pure BiVO<sub>4</sub> (Figure 5a).

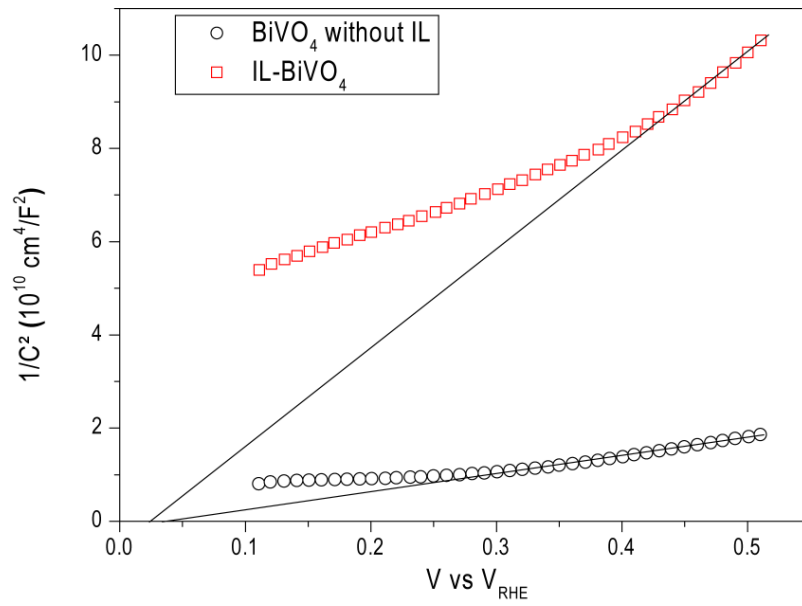

Figure S7. Mott-Schottky plots of  $\text{BiVO}_4$  (prepared without IL) and  $\text{BMIm-BiVO}_4$  prepared by  $\text{BMIm}$  based IL.

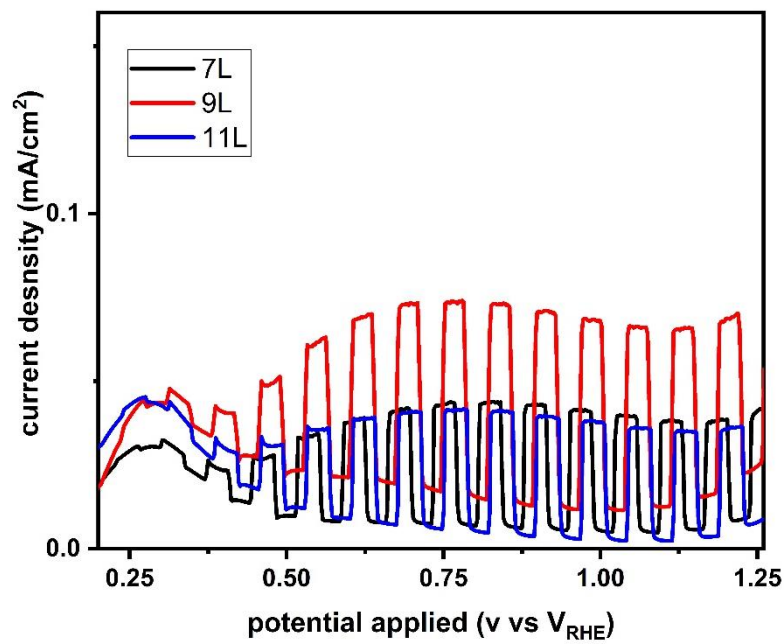

Figure S8. Chopped LSV curves of  $\text{Bi}:[\text{V-Bm}]$  with different layers i.e. 7L, 9L and 11L under 1 Sun illumination.

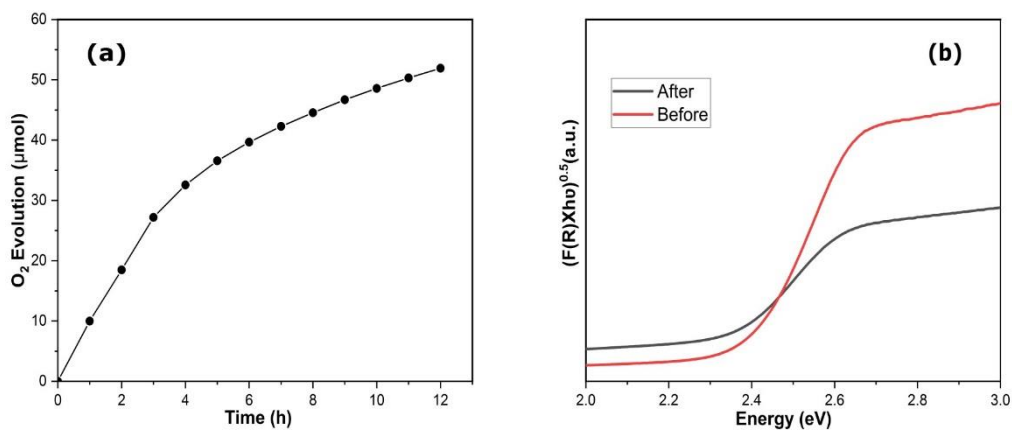

Figure S9: (a) Long time photochemical water oxidation activity of Bi:[V-Bm] at AM 1.5 illumination in 0.05 M of  $\text{Fe}(\text{NO}_3)_3 \cdot 9\text{H}_2\text{O}$ . (b) UV-Vis diffused reflectance of Bi:[V-Bm] before and after 12h photocatalytic oxygen evolution test.
